# Supplementary material for: Effect of Lifestyle Intervention in the Concentration of Adipoquines and Branched Chain Amino Acids in Subjects with High Risk of Developing Type 2 Diabetes: Feel4Diabetes Study
Source: MDPI journal article supplement (doi:10.3390/cells9030693), 2020-03-12
Supplement: s1 [file s1]

**Supplemental table 1.** Baseline BCAA and RBP4 levels according to FINDRISCK items.<sup>1</sup>

| FINDRISC item                                           |                                | Baseline BCAA<br>(nmol/nL) | <i>p</i> <sup>2</sup> | Baseline<br>RBP4<br>(ng/mL) | <i>p</i> <sup>3</sup> |
|---------------------------------------------------------|--------------------------------|----------------------------|-----------------------|-----------------------------|-----------------------|
| Age (years)                                             | <45 (N=172)                    | 401 ± 108                  | 0.243                 | 7.33 ± 5.11                 | 0.483                 |
|                                                         | 45-54 (N=92)                   | 423 ± 113                  |                       | 7.48 ± 5.25                 |                       |
|                                                         | 55-64 (N=1)                    | 467                        |                       | 2.07                        |                       |
| Self-reported BMI (kg/m <sup>3</sup> )                  | <25 (N=93)                     | 374 ± 72.2                 | <0.001                | 7.29 ± 4.26                 | 0.260                 |
|                                                         | 25-30 (N=93)                   | 423 ± 104                  |                       | 7.73 ± 5.23                 |                       |
|                                                         | >30 (N=79)                     | 435 ± 140                  |                       | 6.99 ± 6.01                 |                       |
| Self-reported waist<br>circumference: women/men<br>(cm) | <80/<94 (N=24)                 | 375 ± 74.5                 | 0.244                 | 9.61 ± 5.82                 | 0.093                 |
|                                                         | 80-88/94-102 (N=88)            | 407 ± 82.3                 |                       | 7.04 ± 4.64                 |                       |
|                                                         | >88/>102(N=153)                | 416 ± 127                  |                       | 7.19 ± 5.27                 |                       |
| Physical activity (min)                                 | >30 min/day (N=143)            | 413 ± 116                  | 0.573                 | 7.83 ± 5.36                 | 0.101                 |
|                                                         | <30 min/day (N=122)            | 405 ± 103                  |                       | 6.80 ± 4.86                 |                       |
| Fruit, vegetables and berries<br>consumption            | Everyday(N=193)                | 404 ± 98.8                 | 0.238                 | 7.19 ± 4.70                 | 0.929                 |
|                                                         | Not Everyday (N=72)            | 422 ± 135                  |                       | 7.81 ± 6.22                 |                       |
| Blood pressure medication                               | No (N=237)                     | 406 ± 101                  | 0.235                 | 6.93 ± 4.91                 | <0.001                |
|                                                         | Yes (N=28)                     | 433 ± 168                  |                       | 11.1 ± 5.78                 |                       |
| High glucose levels ever                                | No (N=179)                     | 417 ± 110                  | 0.120                 | 7.35 ± 5.41                 | 0.550                 |
|                                                         | Yes (N=86)                     | 394 ± 108                  |                       | 7.38 ± 4.60                 |                       |
|                                                         | No (N=52)                      | 404 ± 102                  |                       | 7.98 ± 5.97                 |                       |
| T2D family history                                      | Yes, first relative<br>(N=137) | 406 ± 82.2                 | 0.730                 | 7.18 ± 4.41                 | 0.800                 |
|                                                         | Yes, second relative<br>(N=76) | 418 ± 152                  |                       | 7.27 ± 5.80                 |                       |

<sup>1</sup>Variables are expressed as means ± standard deviations. <sup>2</sup>*p* refers to differences in baseline BCAA levels according to different categories for each FINDRISC item calculated by t-test, ANOVA, Kruskal-Wallis test or U Mann Whitney test, as applicable. <sup>3</sup>*p* refers to differences in baseline RBP4 levels according to different categories for each FINDRISC item calculated by t-test, ANOVA, Kruskal-Wallis test or U Mann Whitney test, as applicable.
