# Supplementary material for: Effect of Lifestyle Intervention in the Concentration of Adipoquines and Branched Chain Amino Acids in Subjects with High Risk of Developing Type 2 Diabetes: Feel4Diabetes Study
Source: MDPI journal article supplement (doi:10.3390/cells9030693), 2020-03-12

Supplemental Figure 2. BCAA concentration evolution according to sex in both group

Intervention group (N=151)

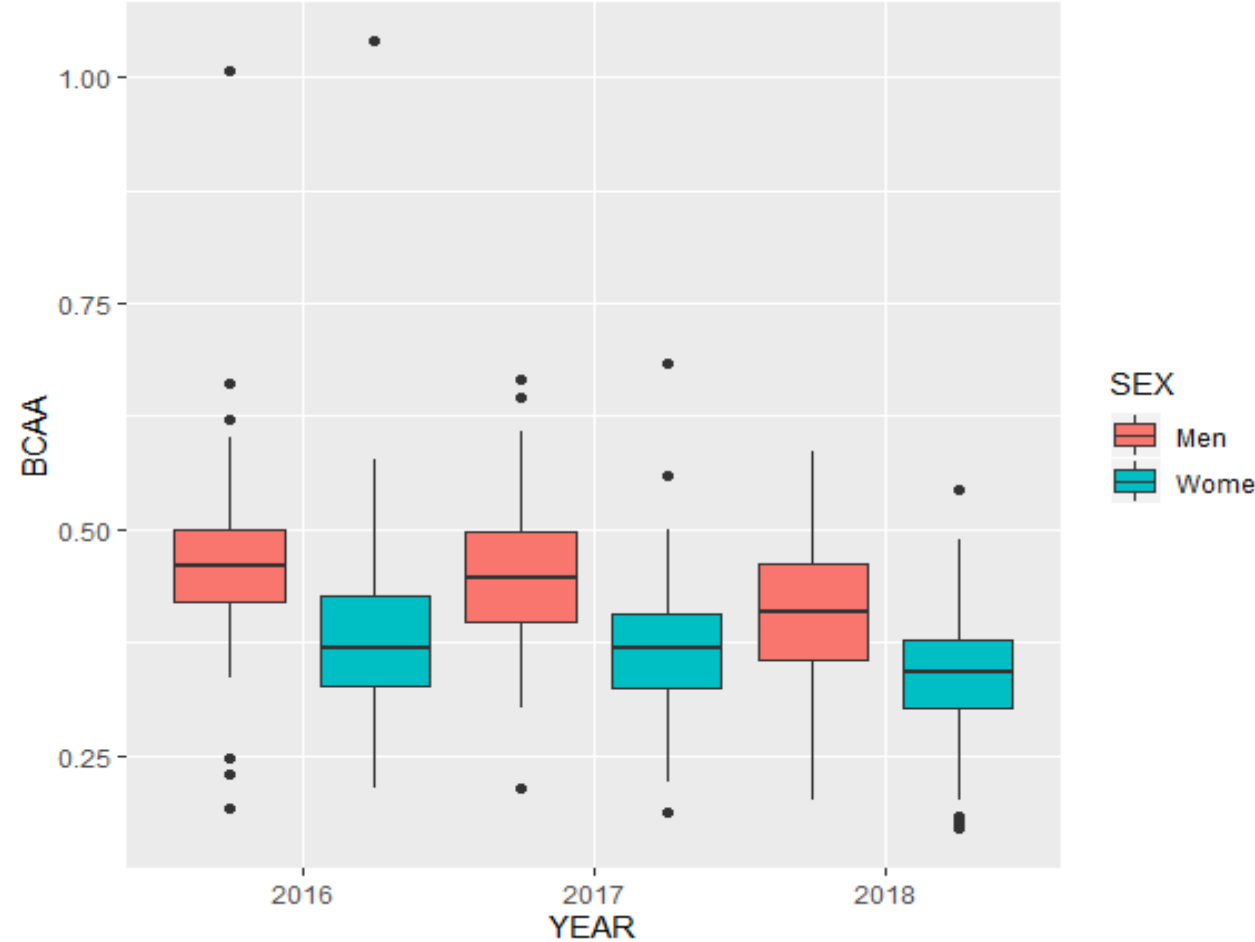

|                                               | 2016<br>(N=151) | 2017<br>(N=151) | 2018<br>(N=151) | p <sup>1</sup> | p <sup>2</sup> |
|-----------------------------------------------|-----------------|-----------------|-----------------|----------------|----------------|
| Men BCAA concentration,<br>nmole/nL (N=51)    | 465 ± 118.5     | 449 ± 89.0      | 411 ± 79.8      | <0.001         | <0.001         |
| Women BCAA concentration,<br>nmole/nL (N=100) | 383 ± 100       | 368 ± 72.1      | 338 ± 69.5      | <0.001         |                |

Control group (N=115)

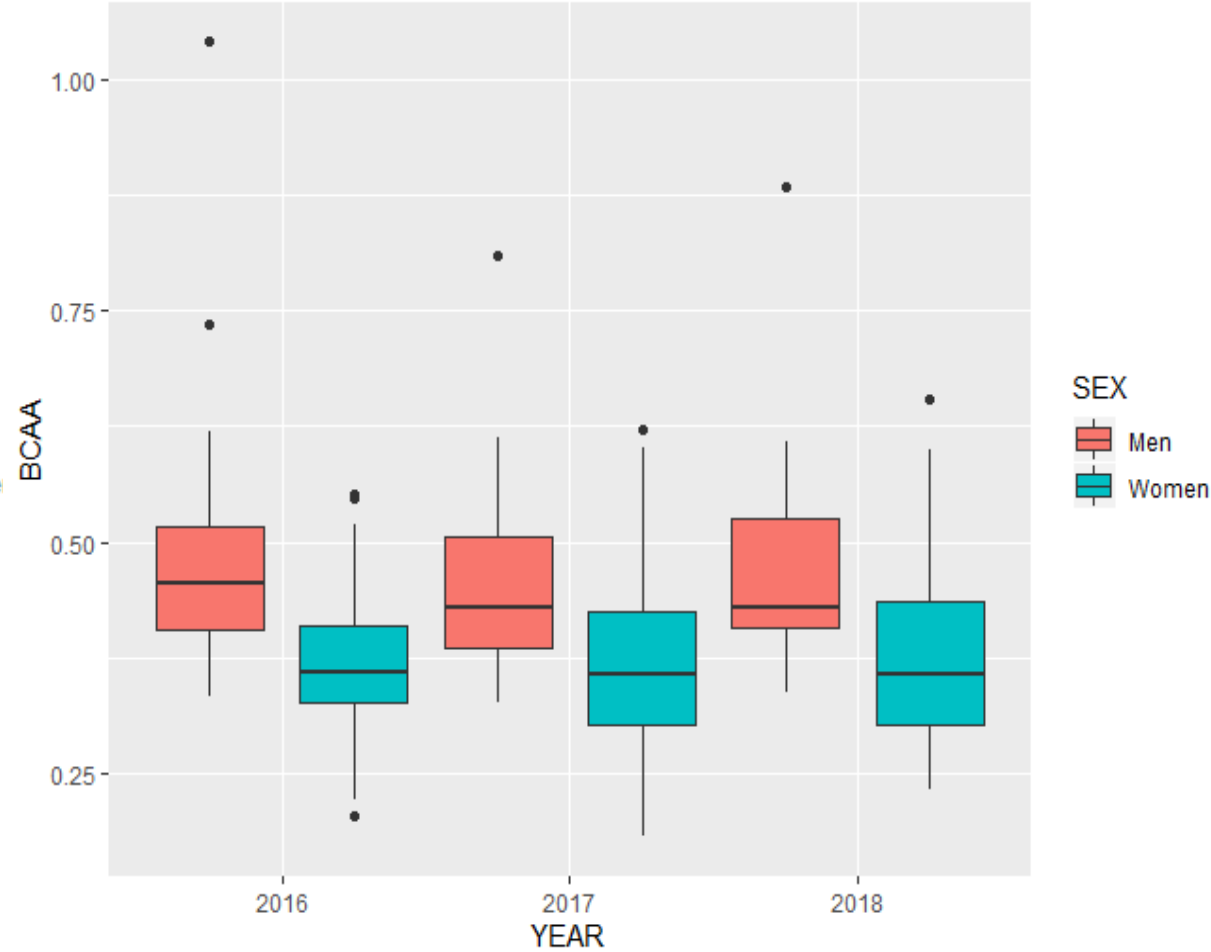

|                                              | 2016<br>(N=115) | 2017<br>(N=115) | 2018<br>(N=115) | p <sup>1</sup> | p <sup>2</sup> |
|----------------------------------------------|-----------------|-----------------|-----------------|----------------|----------------|
| Men BCAA concentration,<br>nmole/nL (N=39)   | 479 ± 123       | 454 ± 99.2      | 464 ± 104       | 0.293          | <0.001         |
| Women BCAA concentration,<br>nmole/nL (N=76) | 369 ± 71.6      | 374 ± 103       | 370 ± 87.0      | 0.870          |                |

**Supplemental Figure 3. Correlation between Baseline levels of BCAA and RBP4 with clinical parameters (N=266)**

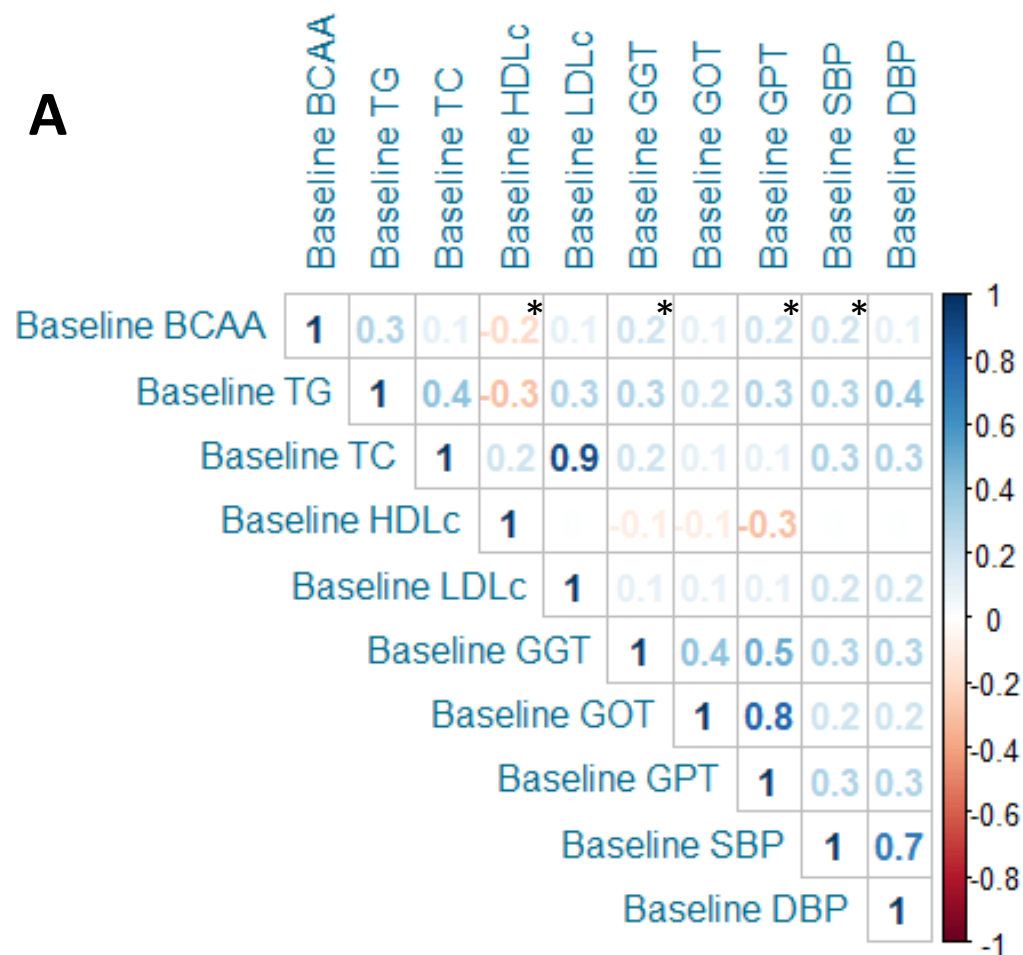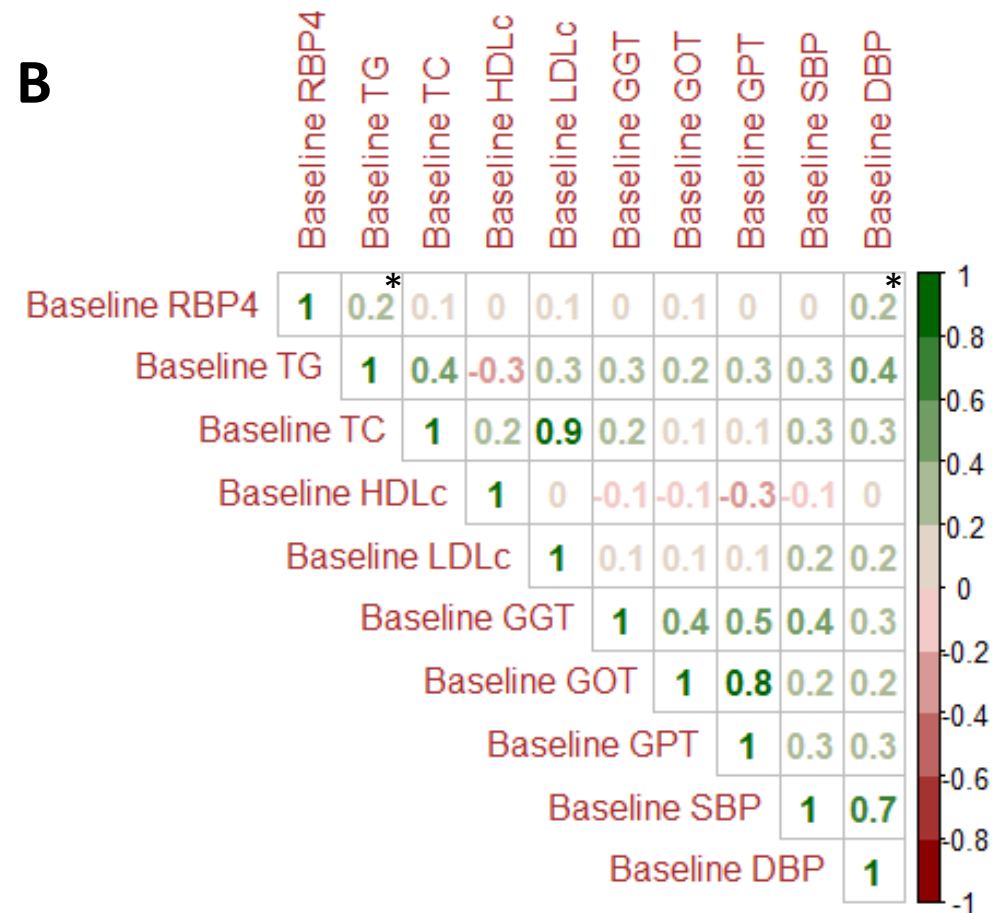

Supplement: s1 [file s1]
